# Supplementary material for: Foxp3 drives oxidative phosphorylation and protection from lipotoxicity
Source: JCI journal article supplement (doi:10.1172/jci.insight.89160), 2017-02-08
Supplement: sd1 [file 1]

a.

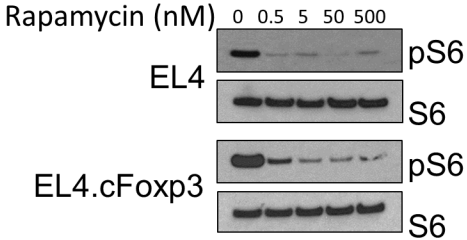

b.

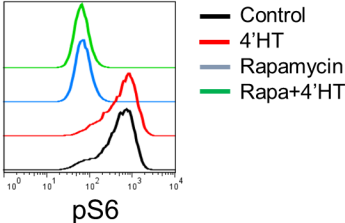

c.

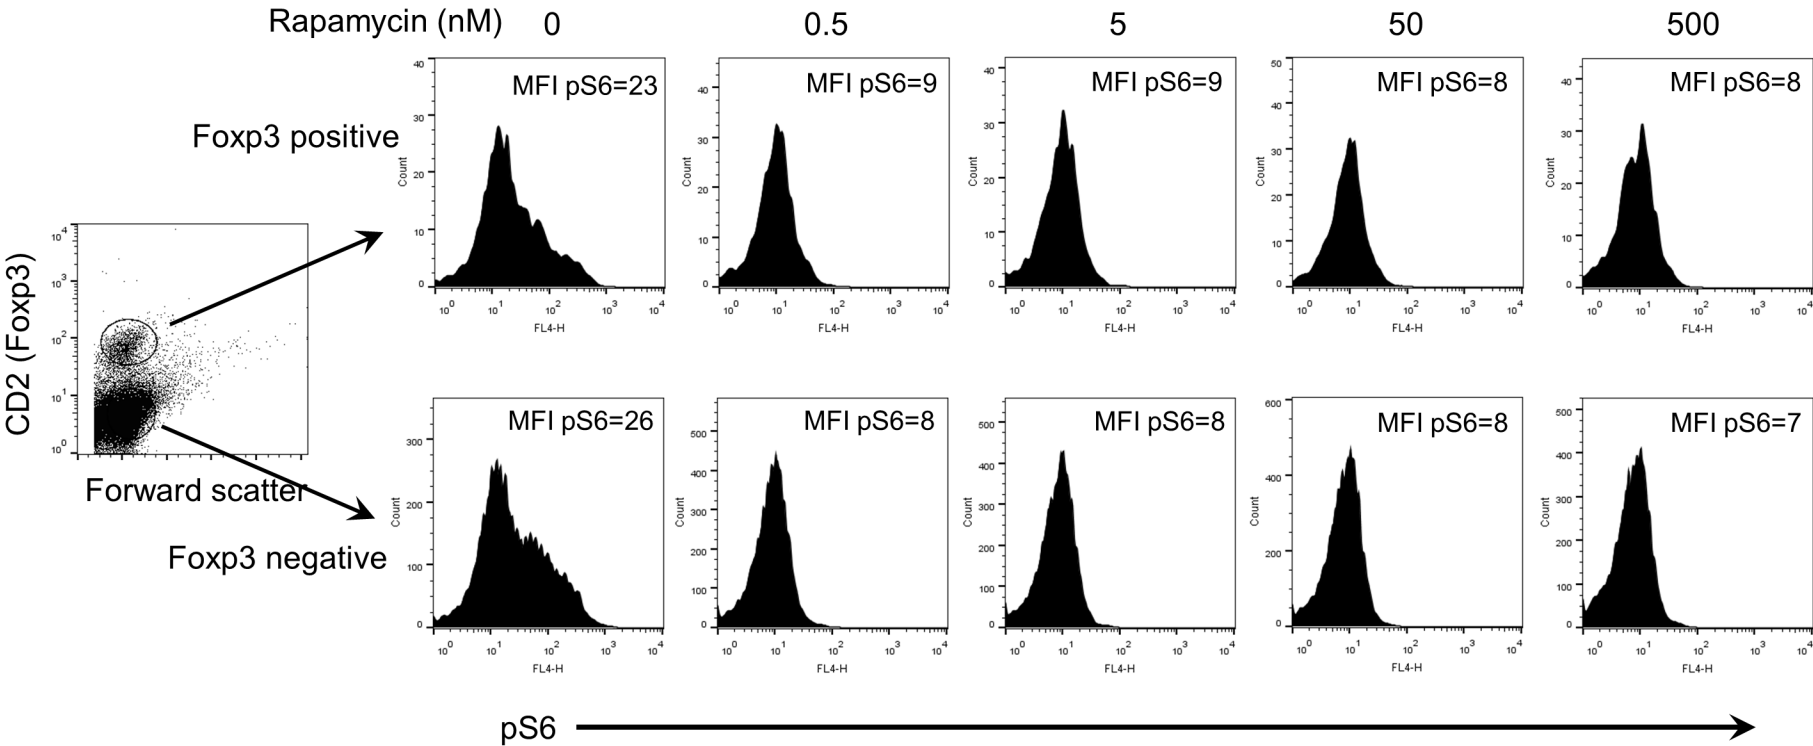

**1116 Supplementary Figure 1**

1117 **a.** Western blot for phospho-ribosomal protein S6 and non phosphorylated S6 in EL4 and  
1118 EL4.cFoxp3 treated for 24 hours with the indicated concentrations of rapamycin. Results  
1119 representative of two experiments.

1120 **b.** Flow cytometric measurement of phospho ribosomal protein S6 in EL4.cFoxp3 cells  
1121 treated for 24 hours with <sup>4</sup>HT, rapamycin or a combination of both. Results representative of  
1122 two experiments.

1123 **c.** Flow cytometric measurement of nTreg and Tconv sensitivity to rapamycin at different  
1124 concentrations. CD4<sup>+</sup> T cells from C57Bl/6.foxp3-hCD2 knockin mice were cultured  
1125 overnight with anti-CD3/CD28 beads plus IL2 and IL7 along with the indicated  
1126 concentrations of rapamycin. Cells were stained for human CD2 and, following  
1127 permeabilisation, phospho-S6 ribosomal protein. Results representative of two experiments.

1128

1129

1130

1131

1132

1133

1134

1135

1136

1137

1138

1139

1140

Howie et al Supplementary Figure 2

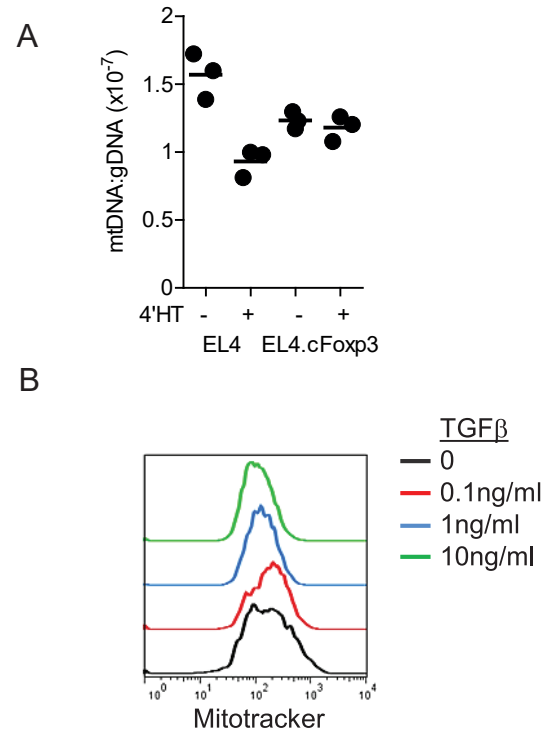

1141 **Supplementary Figure 2.**

1142 **a.** Mitochondrial DNA (mtDNA) to genomic DNA (gDNA) ratios in EL4 T cells versus EL4  
1143 T cells expressing cFoxp3. A representative mtDNA gene; cytochrome *c* oxidase subunit I  
1144 (CO1) and a representative gDNA gene NDUFv1 were measured using quantitative PCR.  
1145 Data representative of two separate experiments.

1146 **b.** Quantification of mitochondrial mass in iTreg cultured RAG<sup>-/-</sup>Marilyn.Foxp3hCD2 T cells  
1147 using mitotracker-deep red FM staining. T Cells were cultured with dendritic cells, peptide  
1148 and titrated doses of TGFβ as indicated. Results representative of three separate experiments.

1149

1150

1151

1152

1153

1154

1155

1156

1157

1158

1159

1160

1161

1162

1163

1164

1165

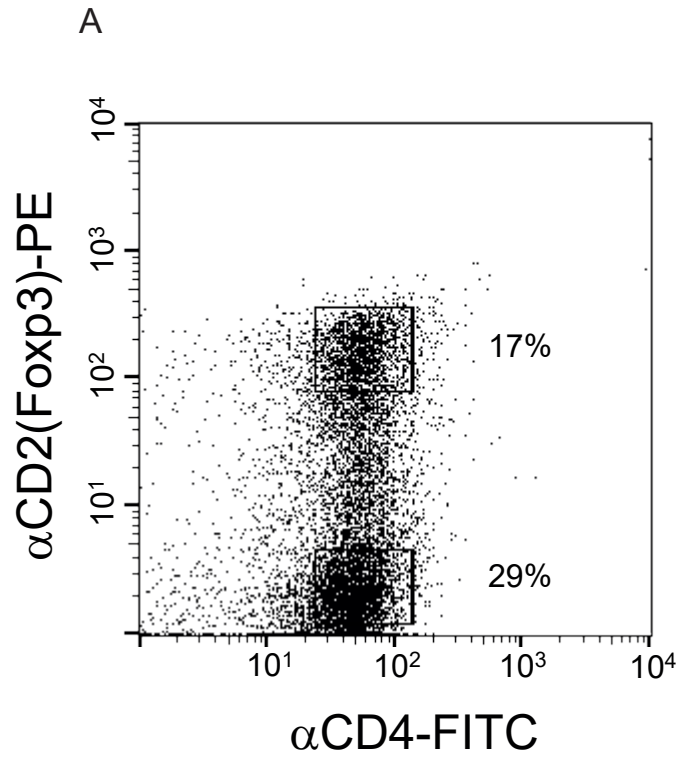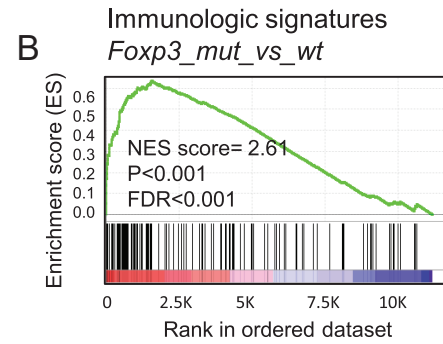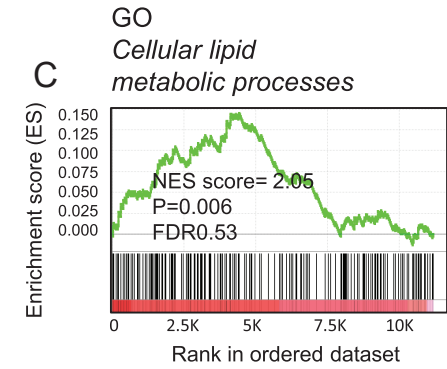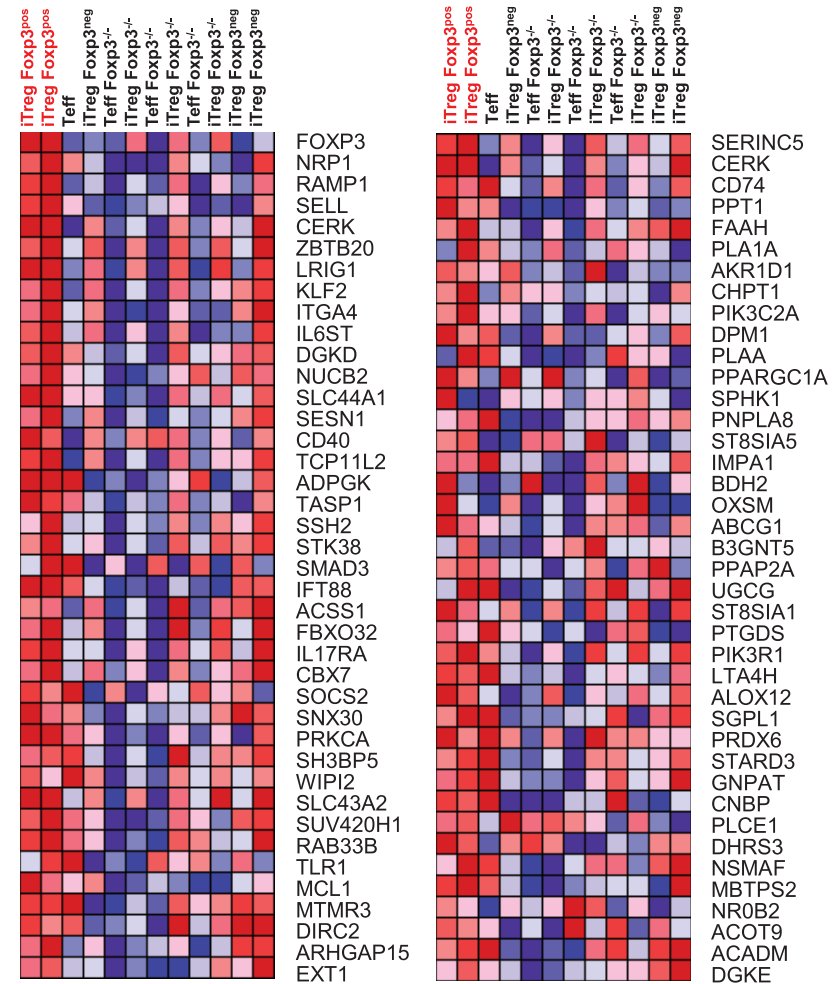

1166 **Supplementary Figure 3.**

1167 **Comparison of Foxp3<sup>+</sup> and Foxp3<sup>-</sup> cells polarised under iTreg conditions.**

1168 **a.** Flow cytometric analysis of CD4<sup>+</sup> T cells from a seven day iTreg induction culture (see  
1169 materials and methods). Cells were stained for CD4 and human CD2. Rectangular gates  
1170 indicate populations of CD2 (Foxp3) high and low cells selected for sorting for downstream  
1171 analysis.

1172 **b.** Gene set enrichment analysis of microarray data from flow cytometry-purified  
1173 Marilyn.foxp3-hCD2 knock-in Foxp3<sup>+</sup> iTreg compared with Foxp3<sup>-</sup> Marilyn T cells grown  
1174 under the same conditions or Marilyn.foxp3<sup>-/-</sup> T cells grown under the same conditions.  
1175 Comparison of all datasets against immunologic signatures. Top panel; gene set enrichment  
1176 analysis showing the influence of Foxp3 expression on the overall gene expression profile of  
1177 CD4 T cells. Bottom panel; Heat map of the top 40 leading edge genes influenced positively  
1178 by Foxp3 compared across all array datasets analysed.

1179 **c.** Comparison of all datasets, as in (a) against Gene Ontology biochemical process  
1180 signatures. Top panel; gene set enrichment analysis showing the influence of Foxp3  
1181 expression on the overall gene expression profile of CD4 T cells. Bottom panel; Heat map of  
1182 the top 40 leading edge genes influenced positively by Foxp3 compared across all array  
1183 datasets analysed.

1184

1185

1186

1187

1188

1189

1190

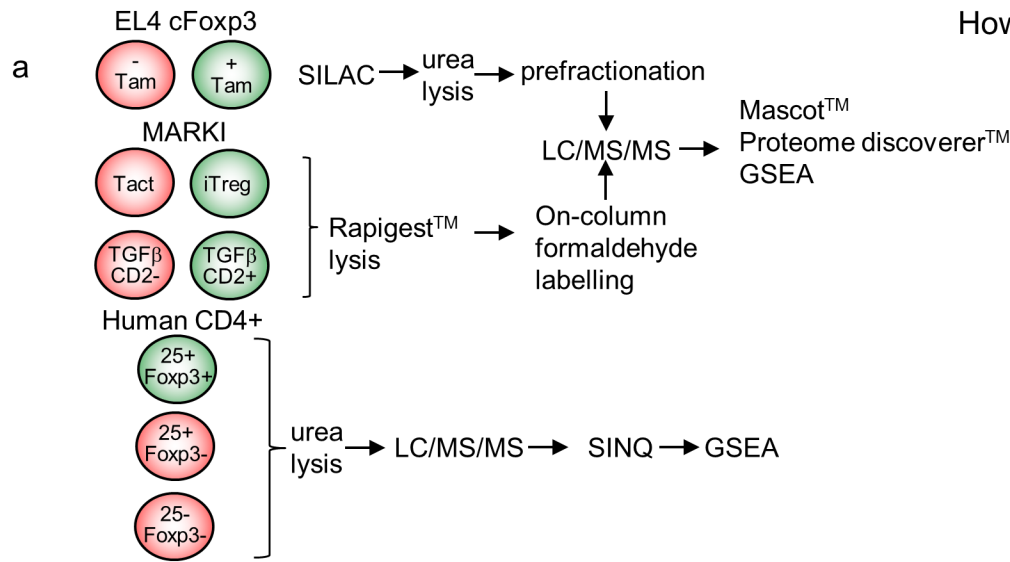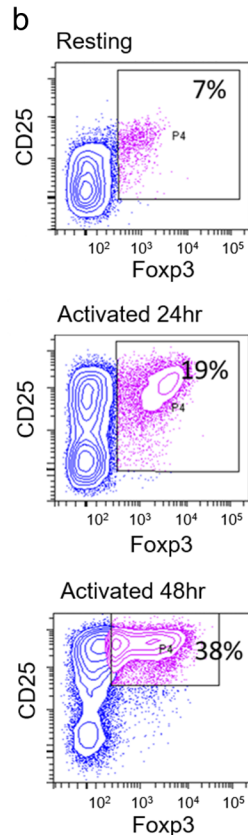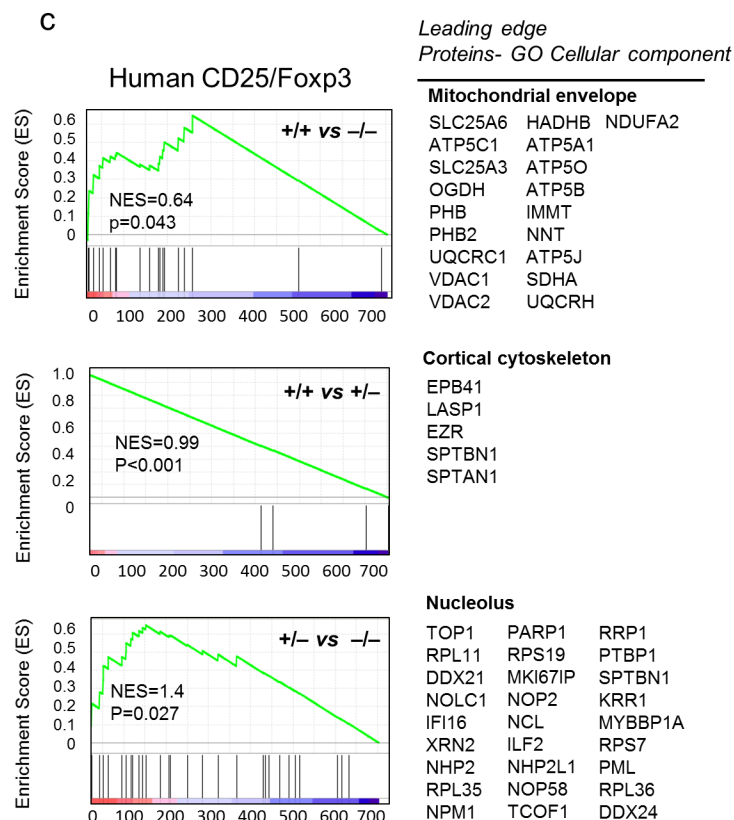

1191 **Supplementary Figure 4.**

1192 **a.** Quantitative mass spectrometry strategy for identification of Foxp3 and TGF $\beta$  controlled  
1193 proteomes. Overall strategy of cell fractionation, labelling, lysis and proteomic quantitation  
1194 of mouse and human Treg proteomes. EL4.cFoxp3, EL4 T cell line transfected with GFP-  
1195 Foxp3-ERT fusion protein “cFoxp3”. RAG<sup>-/-</sup>Marilyn.Foxp3<sup>hCD2</sup>, human CD2 Foxp3-reporter  
1196 mouse TCR transgenic for anti HY TCR. SILAC, stable isotope labelling of cells in culture.  
1197 SINQ, spectral index quantification. GSEA, gene set enrichment analysis.

1198 **b.** Human peripheral blood regulatory CD4<sup>+</sup> T cells before and after 24hr and 48 hr activation  
1199 with anti-TCR stained for Foxp3 and CD25, representative of three experiments. The extreme  
1200 top and bottom 15% of cells from resting and 24hr activated cultures were gated for cell  
1201 sorting.

1202 **c.** Gene set enrichment analysis results of the indicated T cell subset comparisons.  
1203 CD25<sup>+</sup>Foxp3<sup>+</sup> (+/+), CD25<sup>+</sup>Foxp3<sup>-</sup> (+/-), CD25<sup>-</sup>Foxp3<sup>-</sup> (-/-). Representative of three pooled  
1204 patient samples.

1205

1206

1207

1208

1209

1210

1211

1212

1213

1214

1215



iTreg Fxp3<sup>pos</sup> & Fxp3<sup>neg</sup>  
Rapigest™

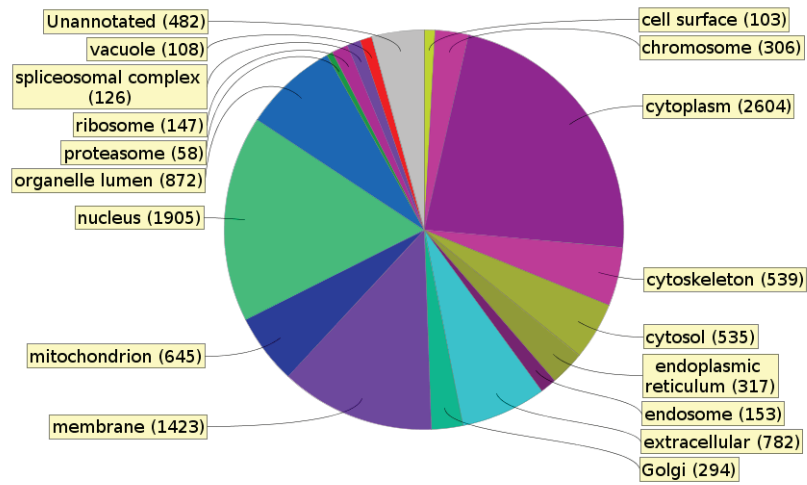

EL4 +/- 4'HT  
8M Urea

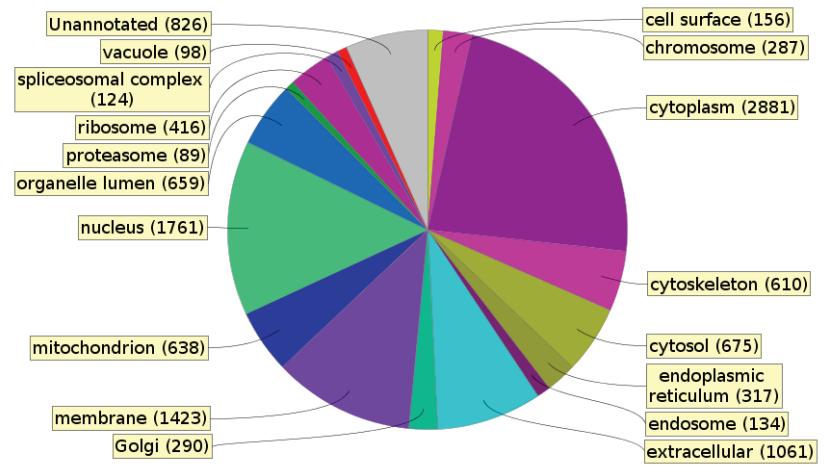

**1216 Supplementary Figure 5**

1217 Comparison of the number of proteins from multiple subcellular compartments extracted  
1218 from proteomic experiments using RAG<sup>-/-</sup>Marilyn.Foxp3hCD2 knock-in T cells with  
1219 Rapigest<sup>TM</sup> surfactant and EL4cFoxp3 cells with 8M urea. Data calculated using  
1220 ProteinCenter<sup>TM</sup> software.

1221

1222

1223

1224

1225
